# Supplementary material
Source: Springer Nature journal article supplement (https://www.springermedizin.de/resource/supplementary/12943_2012_1075_MOESM2_ESM.pdf/9552492)

**A**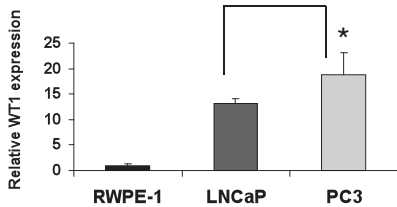**B**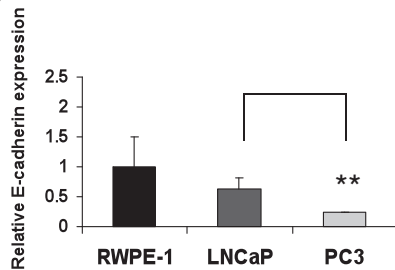**C**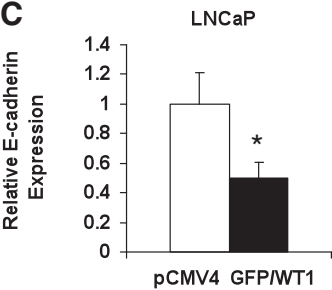**D**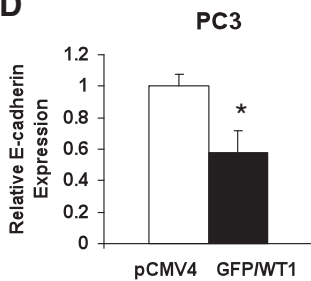**E**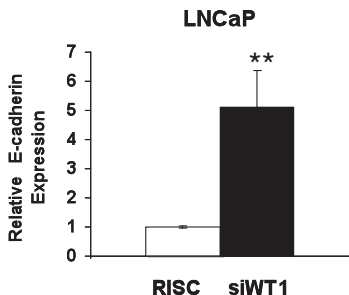**F**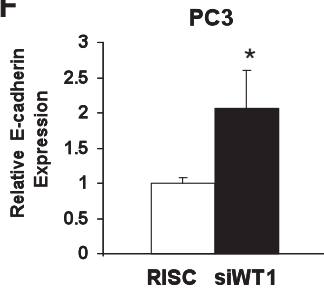

Supplement: MOESM2 [file 9552492]
